# Supplementary material for: Abscisic acid induces ectopic outgrowth in epidermal cells through cortical microtubule reorganization in Arabidopsis thaliana
Source: PubMed Central journal article supplement (PMC4464343; doi:10.1038/srep11364), 2015-06-12
Supplement: srep11364-s1.pdf [file srep11364-s1.pdf]

Abscisic acid induces ectopic outgrowth in epidermal cells  
through cortical microtubule reorganization in *Arabidopsis*  
*thaliana*

Shogo Takatani, Takashi Hirayama, Takashi Hashimoto,  
Taku Takahashi & Hiroyasu Motose

Supplemental Figure S1-S5

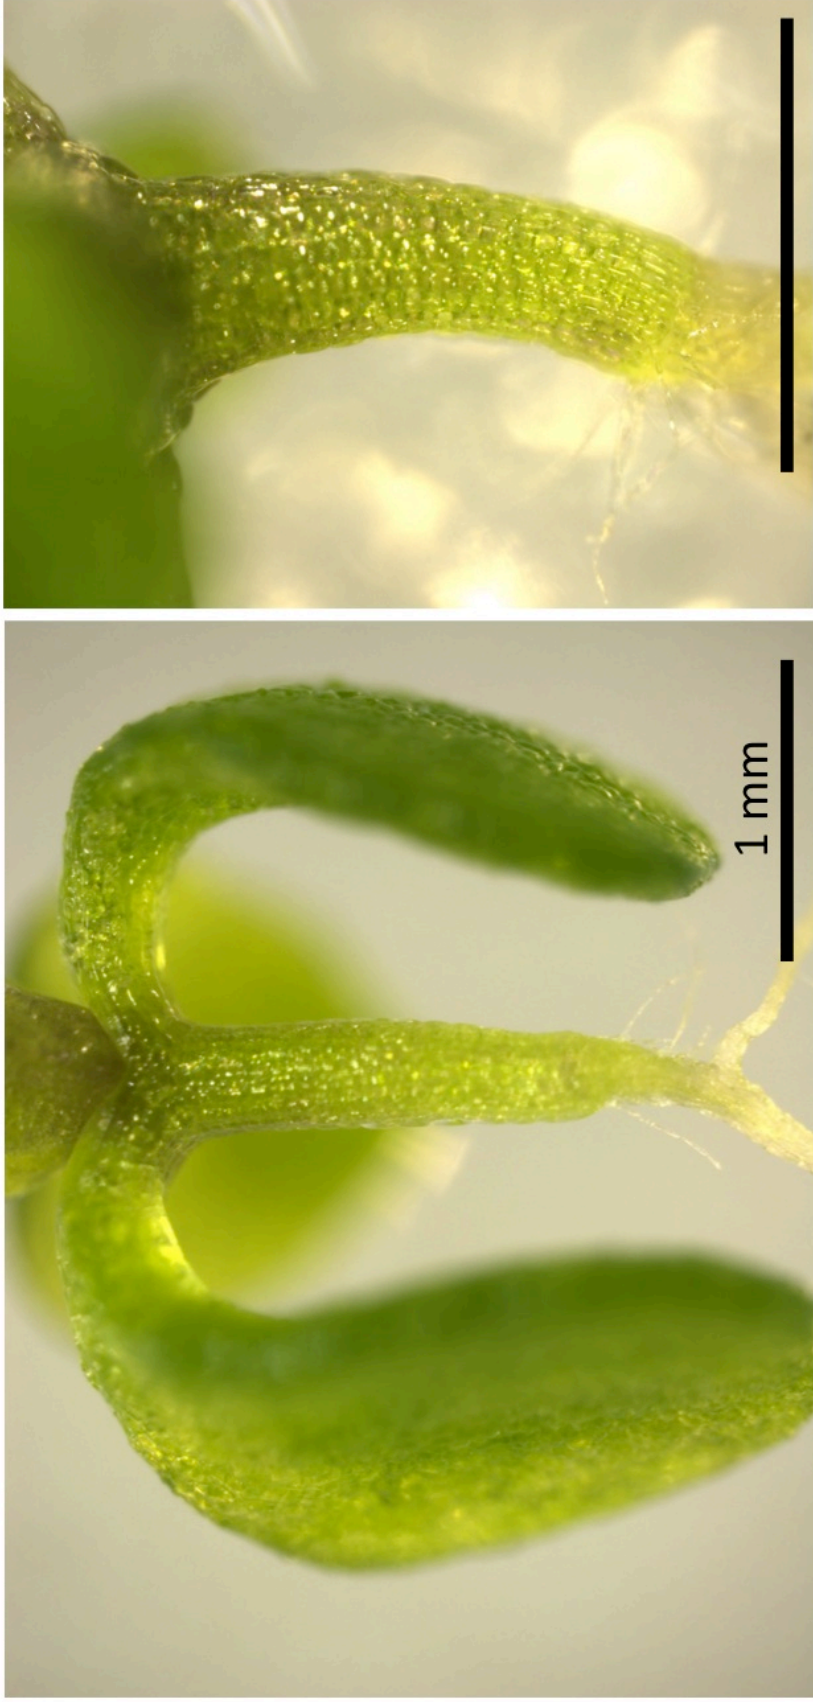

**Supplemental Figure S1 | Effect of salt treatment on epidermal morphology.** The wild type seedlings were germinated and grown for 3 weeks on medium containing 100 mM NaCl. The ectopic outgrowth was not observed (no protrusions in 20 plants).

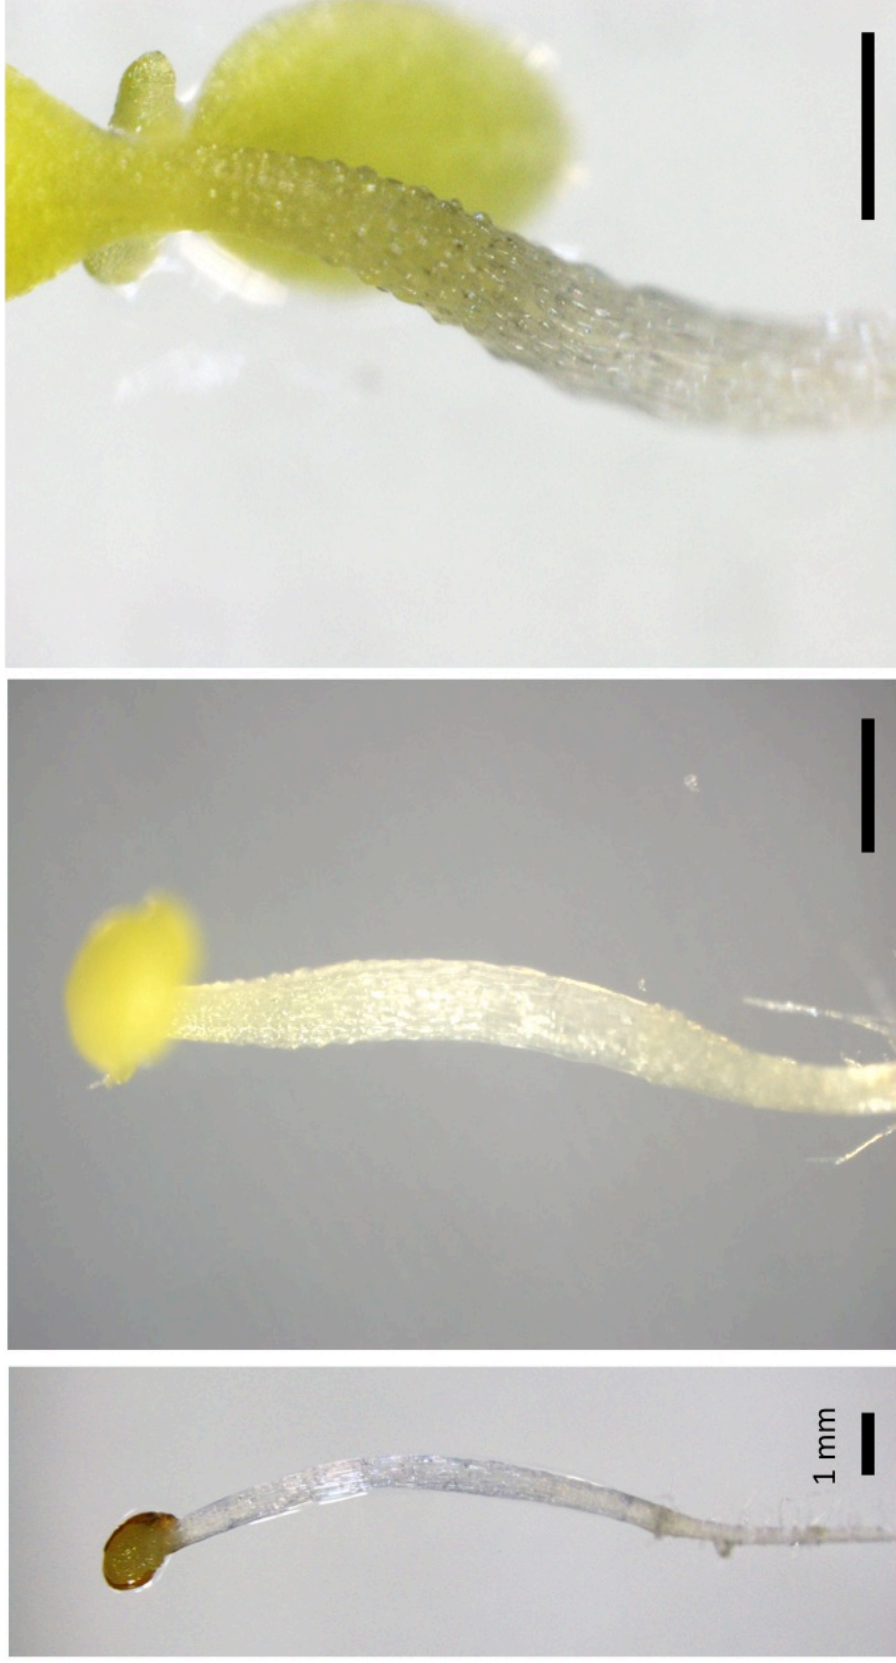

**Supplemental Figure S2 | Effect of cell elongation on ABA-induced ectopic outgrowth.** The wild type seedlings were germinated and grown for 3 weeks under a dark condition on medium containing 1  $\mu$ M ABA. The hypocotyl growth was promoted and ectopic outgrowth was suppressed (no protrusions in 15 plants).



ABA → ABA

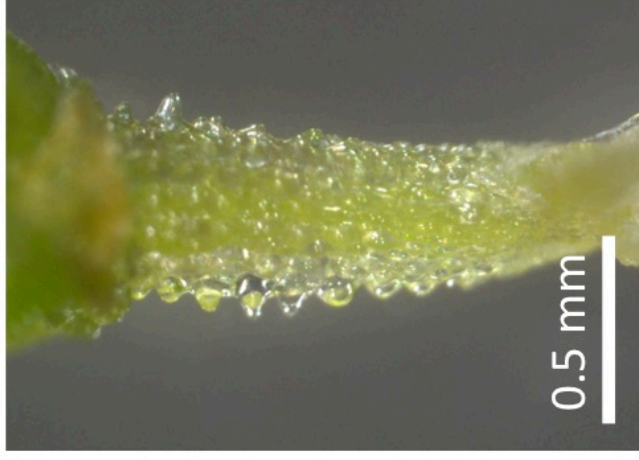

Mock → ABA (3 d)

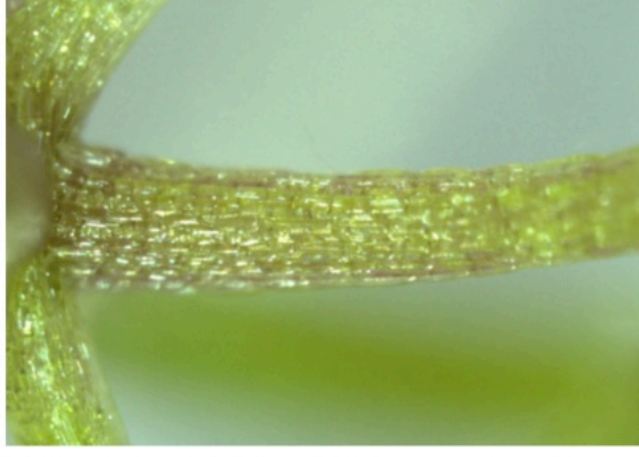

**Supplemental Figure S3 | The requirement of ABA for ectopic outgrowth in the early phase of seedling growth.** The wild type seedlings were germinated and grown for 3 days on medium without ABA and were transferred to medium containing 1  $\mu$ M ABA. The morphology of seedlings was observed at 18 days after transfer. Seedlings did not form ectopic protrusions (12 plants).

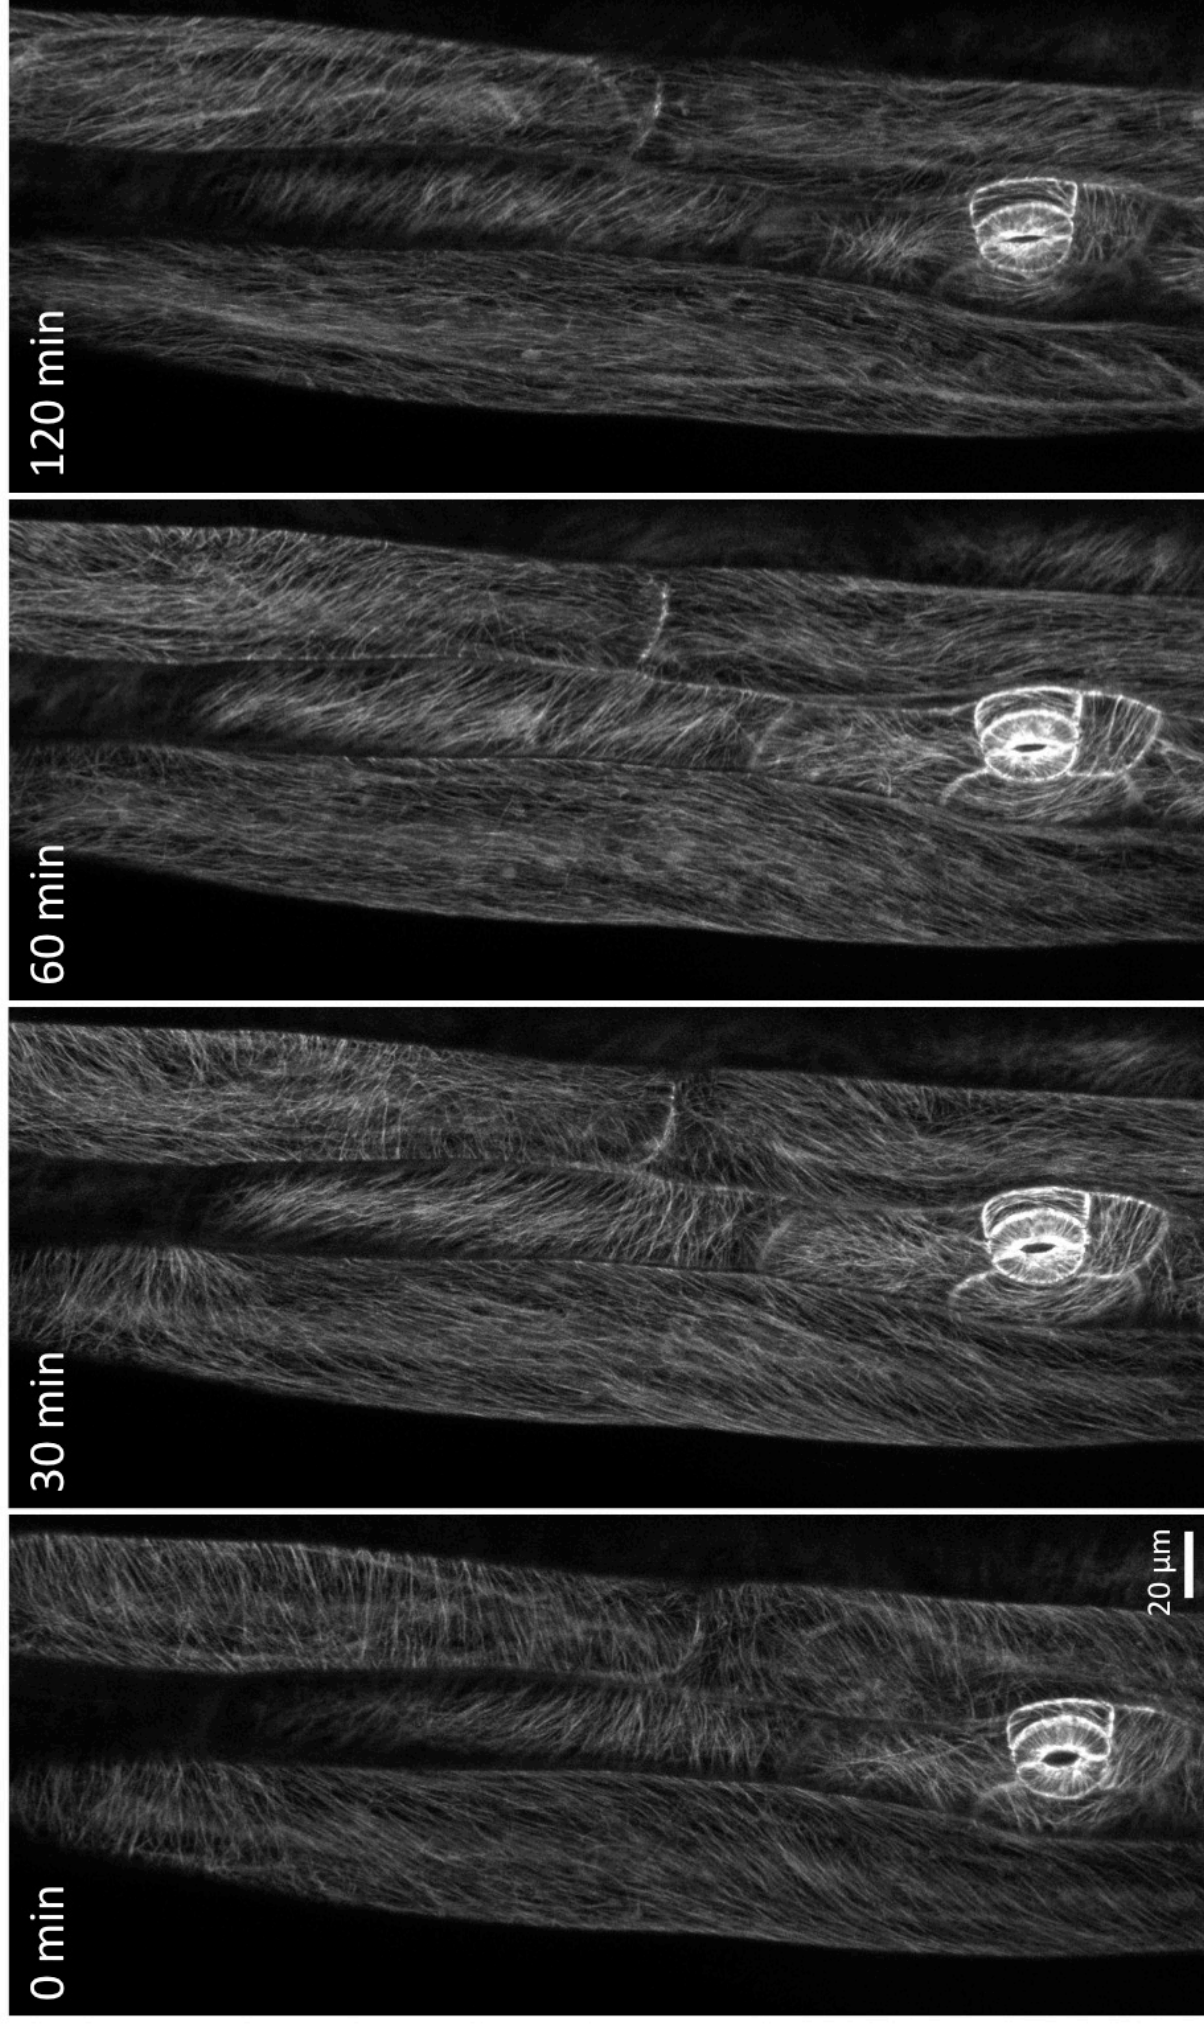

**Supplemental Figure S4 | Effect of short-term treatment with ABA on cortical microtubules.** The GFP-TUB6 seedlings were grown on medium without ABA, transferred into ABA-containing liquid medium, and observed under a confocal microscopy. ABA treatment promoted the longitudinal orientation of cortical microtubules but not induced disorganization and depolymerization of cortical microtubules.

Abcisic acid induces ectopic outgrowth in epidermal cells through cortical microtubule reorganization in *Arabidopsis thaliana*

Shogo Takatani, Takashi Hirayama, Takashi Hashimoto, Taku Takahashi & Hiroyasu Motose

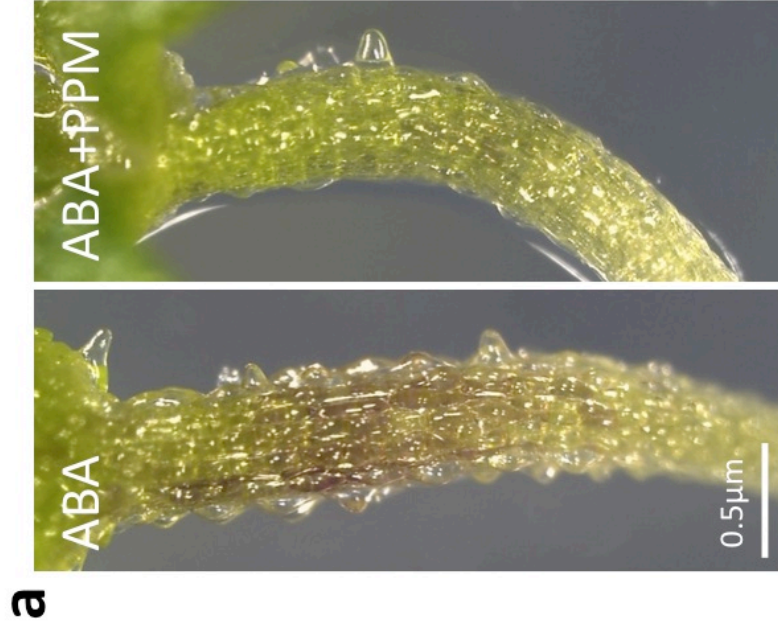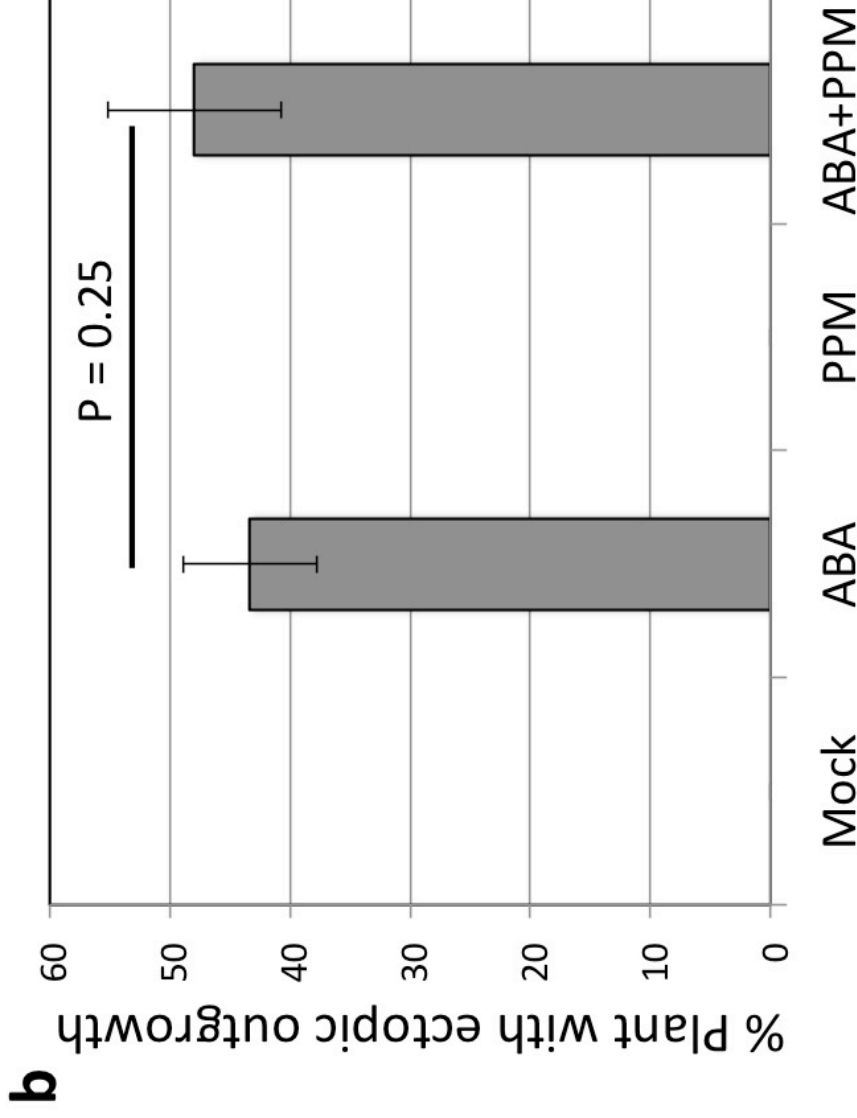

**Supplemental Figure S5 | Effect of propyzamide on ABA-induced ectopic outgrowth.** The wild type seedlings were germinated and grown for 2 weeks on medium without (Mock) or with 1  $\mu\text{M}$  ABA (ABA), 3  $\mu\text{M}$  propyzamide (PPM) or 1  $\mu\text{M}$  ABA plus 3  $\mu\text{M}$  propyzamide (ABA+PPM). (a) Morphology of hypocotyl epidermal cells. (b) Quantification of ectopic outgrowth. Data are displayed as averages  $\pm$  SEM of 3 independent experiments. Propyzamide did not significantly affect ABA-induced ectopic outgrowth ( $P = 0.25$  according to the chi-square test for the difference between two proportions).



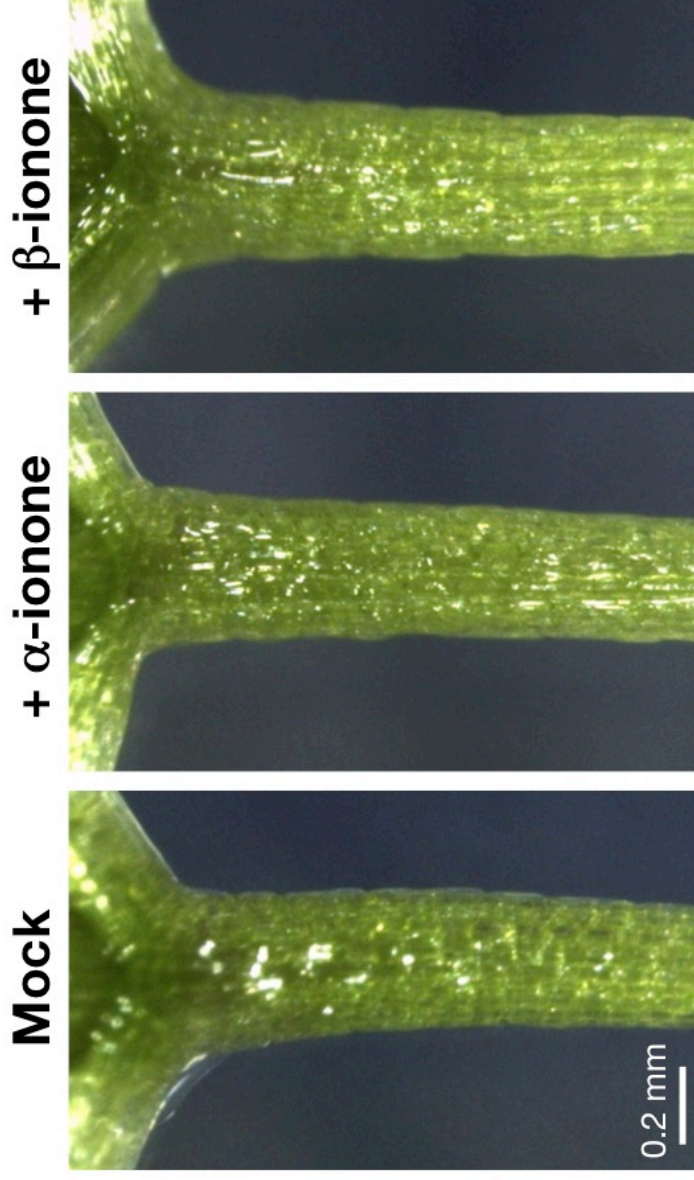

**Supplementary information Figure 1 | Effect of  $\alpha$ -ionone and  $\beta$ -ionone on the morphology of hypocotyl epidermal cells.** The wild type seedlings were germinated and grown for 2 weeks on medium without (Mock) or with  $\alpha$ -ionone or  $\beta$ -ionone at a concentration of 1  $\mu$ M. Ectopic outgrowth was not observed (30 plants in Mock, 38 plants in  $\alpha$ -ionone and 20 plants in  $\beta$ -ionone).

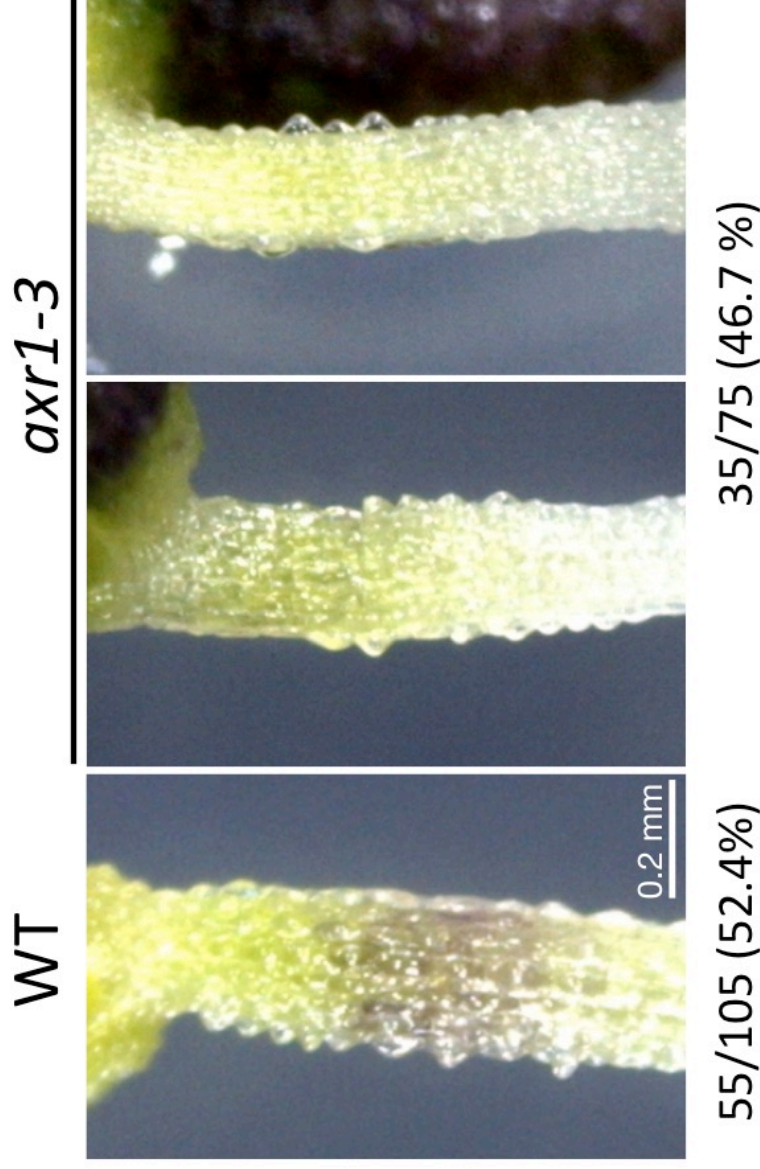

**Supplementary information Figure 2 | Effect of ABA on the morphology of hypocotyl epidermal cells in the wild type and *axr1* mutant.** Morphology of hypocotyls in the wild type (WT) and *auxin resistant 1-3* (*axr1-3*) mutants grown for 2 weeks in the presence of 1  $\mu$ M ABA (ABA). The numbers below indicate the numbers of plants with protrusions / total numbers of plants ( $P = 0.22$  according to the chi-square test for the difference between two proportions).
